# Supplementary material for: Structural Divergence in O-GlcNAc Glycans Displayed on Epidermal Growth Factor-like Repeats of Mammalian Notch1
Source: MDPI journal article supplement (doi:10.3390/molecules23071745), 2018-07-17
Supplement: s1 [file s1]

pSecTag2C/EGF20-MycHis/IRES-EGFP  
(atagacgagtgagcagcaatccctccagcatggtggcacctgttatgataagctcaacgccttcagttgccaatgcatgccgggctatacgggccaaaagtgcgaaacgaat)

pSecTag2C/EGF20ΔGlcΔFuc-MycHis/IRES-EGFP  
(atagacgagtgagcagcgaatccctccagcatggtggcgtctgttatgataagctcaacgccttcagttgccaatgcatgccgggctatacgggccaaaagtgcgaaacgaat)

pSecTag2C/EGF20ΔGlcΔFucΔGlcNAc-MycHis/IRES-EGFP  
(atagacgagtgagcagcgaatccctccagcatggtggcgtctgttatgataagctcaacgccttcagttgccaatgcatgccgggctatacgggccaaaagtgcgaaacgaat)

pSecTag2C/dEGF20ΔGlcΔGlcNAc-MycHis/IRES-EGFP  
(atagacgagtgagcagcgaatccctccagcatggtggcacctgttatgataagctcaacgccttcagttgccaatgcatgccgggctatacgggccaaaagtgcgaaacgaat)

pSecTag2C/dEGF20ΔFucΔGlcNAc-MycHis/IRES-EGFP  
(atagacgagtgagcagcgaatccctccagcatggtggcgtctgttatgataagctcaacgccttcagttgccaatgcatgccgggctatacgggccaaaagtgcgaaacgaat)

Figure S1: DNA sequence of pSectag2C/dEGF20:MycHis-IRES-EGFP series.
